# Supplementary material
Source: PubMed Central journal article supplement (PMC4587705)
Supplement: ASN.2014101034_ASN2014101034SupplementaryData.pdf [file ASN.2014101034_ASN2014101034SupplementaryData.pdf]

**Supplemental Table 1. Characteristics of CKD patients included in this analysis**

| <b>Variables</b>                                  | <b>N</b> | <b>All<br/>(n=38,520)</b> | <b>Age&lt;65 years<br/>(n=9019)</b> | <b>Age &gt;65 years<br/>(n=29501)</b> | <b>Males<br/>(n=16818)</b> | <b>Females<br/>(n=21702)</b> | <b>White<br/>(N=33478)</b> | <b>Black<br/>(N=5042)</b> |
|---------------------------------------------------|----------|---------------------------|-------------------------------------|---------------------------------------|----------------------------|------------------------------|----------------------------|---------------------------|
| <b>Age (years)</b>                                |          | 72.8±11.8                 | 56.2±8.0                            | 77.8±7.2                              | 72.0±11.6                  | 73.3±11.9                    | 73.2±11.5                  | 69.6±13.1                 |
| <b>Male gender (n, %)</b>                         |          | 16818(43.7)               | 4191(46.5)                          | 12627(42.8)                           | 100%                       | 0%                           | 14824(44.3)                | 1994(39.5)                |
| <b>Blacks (n, %)</b>                              |          | 5042(13.1)                | 1639(18.2)                          | 3403(11.5)                            | 1994(11.9)                 | 3048(14.0)                   | 0%                         | 100%                      |
| <b>Diabetes (n, %)</b>                            |          | 8385(21.8)                | 2258(25.0)                          | 6127(20.8)                            | 3961(23.6)                 | 4424(20.4)                   | 6718(20.1)                 | 1667(33.1)                |
| <b>Malignancy (n, %)</b>                          |          | 9100(23.6)                | 1861(20.6)                          | 7239(24.5)                            | 4697(27.9)                 | 4403(20.3)                   | 8143(24.3)                 | 957(19.0)                 |
| <b>Hypertension (n, %)</b>                        |          | 31742(82.4)               | 7274(80.7)                          | 24468(82.9)                           | 13891(82.6)                | 17851(82.3)                  | 27422(81.9)                | 4320(85.7)                |
| <b>Hyperlipidemia (n, %)</b>                      |          | 29038(75.4)               | 6430(71.3)                          | 22608(76.6)                           | 12660(75.3)                | 16378(75.5)                  | 25373(75.8)                | 3665(72.7)                |
| <b>Coronary artery disease (n, %)</b>             |          | 7479(19.4)                | 1064(11.8)                          | 6415(21.7)                            | 4630(27.5)                 | 2849(13.1)                   | 6685(20.0)                 | 794(15.7)                 |
| <b>Congestive heart failure (n, %)</b>            |          | 2812(7.3)                 | 684(7.6)                            | 2128(7.2)                             | 1569(9.3)                  | 1243(5.7)                    | 2274(6.8)                  | 538(10.7)                 |
| <b>Body mass index (kg/m<sup>2</sup>)</b>         | 36350    | 29.3±6.5                  | 31.7±7.8                            | 28.6±5.8                              | 29.0±5.4                   | 29.6±7.2                     | 29.2±6.3                   | 30.5±7.3                  |
| <b>Stage of CKD</b>                               |          |                           |                                     |                                       |                            |                              |                            |                           |
| <b>3a (eGFR 45-59)</b>                            |          | 24639(64.0)               | 6039(67.0)                          | 18600(63.0)                           | 10796(64.2)                | 13843(63.8)                  | 21707(64.8)                | 2932(58.2)                |
| <b>3b (eGFR 30-44)</b>                            |          | 10186(26.4)               | 2001(22.2)                          | 8185(27.7)                            | 4393(26.1)                 | 5793(26.7)                   | 8818(26.3)                 | 1368(27.1)                |
| <b>4 (eGFR 15-29)</b>                             |          | 3149(8.2)                 | 755(8.4)                            | 2394(8.1)                             | 1365(8.1)                  | 1784(8.2)                    | 2564(7.7)                  | 585(11.6)                 |
| <b>5 (eGFR&lt;15)</b>                             |          | 546(1.4)                  | 224(2.5)                            | 322(1.1)                              | 264(1.6)                   | 282(1.3)                     | 389(1.2)                   | 157(3.1)                  |
| <b>Outpatient visits per year, P50 [P25, P75]</b> |          | 5.2 [2.9, 9.0]            | 5.8 [3.0, 11.0]                     | 5.1 [2.9, 8.5]                        | 5.2 [2.9, 9.2]             | 5.3 [2.9, 8.8]               | 5.2 [2.9, 8.8]             | 5.7 [2.9, 9.7]            |
| <b>Serum albumin (g/dl)</b>                       | 31226    | 4.1±0.48                  | 4.1±0.55                            | 4.1±0.46                              | 4.1±0.49                   | 4.1±0.47                     | 4.1±0.47                   | 4.0±0.53                  |
| <b>Hemoglobin (g/dl)</b>                          | 32262    | 12.8±1.8                  | 12.8±2.0                            | 12.8±1.7                              | 13.2±1.9                   | 12.6±1.6                     | 12.9±1.8                   | 12.1±1.8                  |
| <b>ACEI/ARB use (n, %)</b>                        |          | 23620(61.3)               | 5350(59.3)                          | 18270(61.9)                           | 10907(64.9)                | 12713(58.6)                  | 20096(60.0)                | 3524(69.9)                |
| <b>Statins use (n, %)</b>                         |          | 20984(54.5)               | 4424(49.1)                          | 16560(56.1)                           | 10072(59.9)                | 10912(50.3)                  | 18229(54.5)                | 2755(54.6)                |
| <b>Beta-blocker use (n, %)</b>                    |          | 21198(55.0)               | 4505(50.0)                          | 16693(56.6)                           | 9908(58.9)                 | 11290(52.0)                  | 18223(54.4)                | 2975(59.0)                |
| <b>Insurance (n, %)</b>                           |          |                           |                                     |                                       |                            |                              |                            |                           |
| <b>Medicaid</b>                                   |          | 258(0.67)                 | 193(2.1)                            | 65(0.22)                              | 81(0.48)                   | 177(0.82)                    | 146(0.44)                  | 112(2.2)                  |
| <b>Medicare</b>                                   |          | 31364(81.4)               | 4139(45.9)                          | 27225(92.3)                           | 13395(79.6)                | 17969(82.8)                  | 27565(82.3)                | 3799(75.3)                |
| <b>Missing</b>                                    |          | 1135(2.9)                 | 553(6.1)                            | 582(2.0)                              | 520(3.1)                   | 615(2.8)                     | 842(2.5)                   | 293(5.8)                  |
| <b>Other</b>                                      |          | 5763(15.0)                | 4134(45.8)                          | 1629(5.5)                             | 2822(16.8)                 | 2941(13.6)                   | 4925(14.7)                 | 838(16.6)                 |
| <b>Smoking Status (n, %)</b>                      |          |                           |                                     |                                       |                            |                              |                            |                           |
| <b>No</b>                                         |          | 28705(74.5)               | 6280(69.6)                          | 22425(76.0)                           | 12377(73.6)                | 16328(75.2)                  | 25113(75.0)                | 3592(71.2)                |
| <b>Yes</b>                                        |          | 2586(6.7)                 | 1039(11.5)                          | 1547(5.2)                             | 1287(7.7)                  | 1299(6.0)                    | 2054(6.1)                  | 532(10.6)                 |
| <b>Missing</b>                                    |          | 7229(18.8)                | 1700(18.8)                          | 5529(18.7)                            | 3154(18.8)                 | 4075(18.8)                   | 6311(18.9)                 | 918(18.2)                 |

Values presented as mean ± SD or N (%) unless otherwise noted

**Supplemental table 2.** Unadjusted all-cause mortality rates among various subgroups

|                   | <b>All-cause mortality<br/>(per 1,000 years of follow up)</b> |
|-------------------|---------------------------------------------------------------|
| Age>65 years      | 83.3                                                          |
| Age<65 years      | 51.5                                                          |
| Males             | 90.6                                                          |
| Females           | 65.5                                                          |
| Whites            | 74.8                                                          |
| Blacks            | 84.6                                                          |
| Diabetics         | 69.2                                                          |
| Non-Diabetics     | 78.0                                                          |
| Stage 3a CKD      | 60.0                                                          |
| Stage 3b CKD      | 90.8                                                          |
| Stage 4 and 5 CKD | 146.0                                                         |

**Supplemental table 3.** Deaths related to specific types of malignancy

| <b>Types of malignancy</b>                                                              | <b>N (%)</b><br>Total N = 2117 |
|-----------------------------------------------------------------------------------------|--------------------------------|
| Malignant neoplasms of trachea, bronchus and lung                                       | 371 (17.5)                     |
| Malignant neoplasms of colon, rectum and anus                                           | 173 (8.2)                      |
| Leukemia                                                                                | 168 (7.9)                      |
| Malignant neoplasm of prostate                                                          | 164 (7.8)*                     |
| Malignant neoplasm of breast                                                            | 149 (7.0)*                     |
| Malignant neoplasms of kidney and renal pelvis                                          | 146 (6.9)                      |
| Malignant neoplasm of bladder                                                           | 120 (5.7)                      |
| Multiple myeloma and immunoproliferative neoplasms                                      | 107 (5.1)                      |
| Non-Hodgkin's lymphoma                                                                  | 102 (4.8)                      |
| Malignant neoplasm of pancreas                                                          | 81 (3.8)                       |
| Malignant neoplasm of ovary                                                             | 72 (3.4)*                      |
| Malignant neoplasms of liver and intrahepatic bile ducts                                | 56 (2.7)                       |
| Malignant neoplasm of esophagus                                                         | 44 (2.1)                       |
| Malignant neoplasms of corpus uteri and uterus, part unspecified                        | 35 (1.7)                       |
| Malignant neoplasms of meninges, brain and other parts of central nervous system        | 27 (1.3)                       |
| Malignant melanoma of skin                                                              | 23 (1.1)                       |
| Malignant neoplasm of stomach                                                           | 23 (1.1)                       |
| Malignant neoplasms of lip, oral cavity and pharynx                                     | 19 (0.9)                       |
| Malignant neoplasm of cervix uteri                                                      | 12 (0.6)                       |
| Malignant neoplasm of larynx                                                            | 7 (0.3)                        |
| Hodgkin's disease                                                                       | 5 (0.2)                        |
| Other and unspecified malignant neoplasms of lymphoid, hematopoietic and related tissue | 1 (0.1)                        |
| All other and unspecified malignant neoplasms                                           | 212 (10.0)                     |

\*Prostate 14.5% among males, breast and ovary 15% and 7.3% respectively among females

**Supplemental table 4.** Associations between the covariates and various causes of mortality

|                          | All-cause         | Cardiovascular    | Malignancy        | Other             |
|--------------------------|-------------------|-------------------|-------------------|-------------------|
| Blacks                   | 1.04 (0.97, 1.12) | 1.20 (1.06, 1.35) | 0.89 (0.77, 1.02) | 1.12 (0.99, 1.26) |
| Male gender              | 1.48 (1.41, 1.56) | 1.56 (1.43, 1.71) | 1.51 (1.38, 1.65) | 1.39 (1.27, 1.53) |
| Diabetes                 | 1.03 (0.96, 1.10) | 1.01 (0.90, 1.13) | 0.80 (0.70, 0.92) | 1.36 (1.21, 1.53) |
| CKD stage                |                   |                   |                   |                   |
| eGFR 30-44               | 1.21 (1.14, 1.27) | 1.35 (1.23, 1.48) | 1.03 (0.93, 1.14) | 1.29 (1.17, 1.42) |
| eGFR <30                 | 1.58 (1.46, 1.70) | 1.85 (1.64, 2.09) | 1.00 (0.86, 1.16) | 1.93 (1.71, 2.18) |
| Hypertension             | 0.87 (0.81, 0.94) | 0.64 (0.57, 0.72) | 0.93 (0.82, 1.05) | 0.96 (0.85, 1.09) |
| Hyperlipidemia           | 0.73 (0.68, 0.79) | 0.85 (0.75, 0.96) | 0.69 (0.60, 0.78) | 0.75 (0.66, 0.85) |
| BMI (kg/m <sup>2</sup> ) |                   |                   |                   |                   |
| <18.5                    | 1.72 (1.47, 2.01) | 1.64 (1.18, 2.29) | 1.58 (1.15, 2.17) | 1.95 (1.54, 2.47) |
| 25-29                    | 0.74 (0.69, 0.79) | 0.78 (0.70, 0.87) | 0.69 (0.62, 0.77) | 0.75 (0.66, 0.85) |
| >30                      | 0.71 (0.66, 0.76) | 0.76 (0.66, 0.88) | 0.65 (0.57, 0.73) | 0.79 (0.70, 0.88) |
| Malignancy               | 1.97 (1.87, 2.08) | 0.82 (0.74, 0.92) | 7.39 (6.70, 8.16) | 0.92 (0.82, 1.03) |
| Coronary Artery Disease  | 1.01 (0.94, 1.08) | 1.26 (1.13, 1.40) | 0.75 (0.65, 0.86) | 1.03 (0.91, 1.16) |
| Congestive Heart Failure | 1.98 (1.84, 2.14) | 2.98 (2.67, 3.32) | 1.11 (0.92, 1.35) | 1.57 (1.36, 1.81) |
| Insurance                |                   |                   |                   |                   |
| Medicare vs. other       | 0.75 (0.69, 0.82) | 0.98 (0.83, 1.16) | 0.60 (0.53, 0.69) | 0.80 (0.68, 0.94) |
| Medicaid vs. other       | 2.14 (1.75, 2.60) | 3.09 (2.16, 4.44) | 1.59 (1.10, 2.30) | 2.39 (1.73, 3.30) |
| ACEI/ARB use             | 0.94 (0.88, 0.99) | 1.23 (1.11, 1.37) | 0.77 (0.70, 0.85) | 0.93 (0.83, 1.03) |
| Statins use              | 1.06 (0.99, 1.15) | 1.02 (0.90, 1.15) | 1.14 (1.00, 1.31) | 0.99 (0.87, 1.13) |
| Beta-blocker use         | 1.22 (1.15, 1.29) | 1.35 (1.22, 1.50) | 1.14 (1.04, 1.25) | 1.17 (1.06, 1.29) |
| Smoker                   | 1.20 (1.09, 1.33) | 1.30 (1.10, 1.54) | 1.22 (1.02, 1.47) | 1.15 (0.97, 1.37) |
| Age                      | *                 | *                 | *                 | *                 |
| Albumin                  | *                 | *                 | *                 | *                 |
| Hemoglobin               | *                 | *                 | *                 | *                 |

\*Variable was modeled with splines and overall hazard ratio cannot be estimated.

**Supplemental table 5.** Associations between various causes of death based on eGFR for whom proteinuria data was available (N=18,347)

|                                                           | <b>HR (95%CI) adjusted*</b> |
|-----------------------------------------------------------|-----------------------------|
| <i>CKD Stage 3b vs. Stage 3a</i>                          |                             |
| All-cause mortality <sup>#</sup>                          | 1.14 (1.06, 1.23)           |
| Deaths due to malignancy                                  | 1.0 (0.87, 1.15)            |
| Deaths due to cardiovascular disease                      | 1.18 (1.04, 1.34)           |
| Non-cardiovascular and non-malignancy deaths <sup>^</sup> | 1.27 (1.11, 1.45)           |
| <i>CKD Stage 4 and 5 vs. Stage 3a</i>                     |                             |
| All-cause mortality <sup>#</sup>                          | 1.42 (1.28, 1.56)           |
| Deaths due to malignancy                                  | 0.91 (0.74, 1.11)           |
| Deaths due to cardiovascular disease                      | 1.55 (1.32, 1.83)           |
| Non-cardiovascular and non-malignancy deaths <sup>^</sup> | 1.82 (1.54, 2.14)           |

\*Model includes age, race gender, diabetes, HTN, hyperlipidemia, BMI group, albumin and hemoglobin, malignancy, CAD, CHF, insurance, ACE/ARB, statin, beta blocker, smoking, and proteinuria. HR shown were pooled using MIanalyze from 5 datasets created using multiple imputations. Each of the 5 datasets contained 18,347 patients with proteinuria data. # Includes all deaths related to non-disease causes.

<sup>^</sup> This does not include non-disease cause related deaths

**Supplemental Table 6.** Associations of cardiovascular and malignancy-related death and kidney disease (excluding the presence of baselinedisease from model)

|                                        | <b>HR (95%CI) adjusted</b> |
|----------------------------------------|----------------------------|
| <i>CKD Stage 3b vs. Stage 3a</i>       |                            |
| Deaths due to malignancy*              | 0.93 (0.84, 1.03)          |
| Deaths due to cardiovascular disease** | 1.39 (1.27, 1.53)          |
| <i>CKD Stage 4 and 5 vs. Stage 3a</i>  |                            |
| Deaths due to malignancy*              | 0.85 (0.74, 0.99)          |
| Deaths due to cardiovascular disease** | 1.95 (1.73, 2.19)          |

\*Model includes age, race gender, diabetes, HTN, hyperlipidemia, BMI group, albumin and hemoglobin, CAD, CHF, insurance, ACE/ARB, statin, beta blocker, smoking, and proteinuria.

\*\*Model includes age, race gender, diabetes, HTN, hyperlipidemia, BMI group, albumin and hemoglobin, malignancy, insurance, ACE/ARB, statin, beta blocker, smoking, and proteinuria.

HR shown were pooled using MIanalyze from 5 datasets created using multiple imputations.

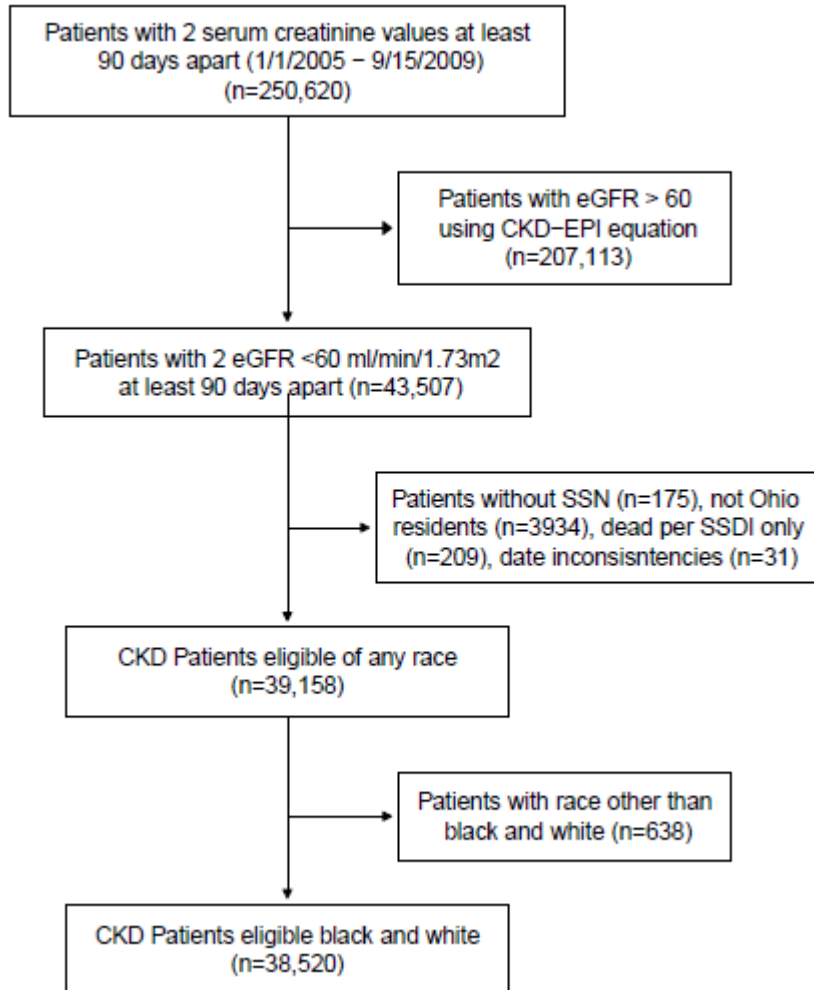

**Supplemental figure 1.** Flow-chart showing how patients were selected for this analysis

## **Methods:**

### *Sensitivity analyses*

- a) We fit a model adjusting for proteinuria among the subset of patients with proteinuria data (n=18,347).
- b) To evaluate the association between CKD stage and cardiovascular disease irrespective of the presence of baseline coronary artery disease and heart failure, we also fit an adjusted model of cardiovascular mortality excluding from the model variables for coronary artery disease and heart failure. Similarly we evaluated the association between CKD stage and malignancy mortality in an adjusted model excluding baseline malignancy.
- c) To evaluate the impact of multiple imputation on the analysis results, we compared all-cause mortality models using multiple imputation, models using only complete case data, and models using mean value imputation with indicators of missing data.

## **Results**

### *Sensitivity analyses*

- a) In a subgroup of patients who had at least one urinary protein study (n=18,347, 48%), the risk for death and specific causes of death was similar to the primary analysis, with only slight attenuation of the associations (Supplemental Table 5).
- b) The model for cardiovascular mortality excluding from the model variables for coronary artery disease and heart failure showed a similar association between CKD stage and mortality as the primary model (Supplemental table 6). The model for malignancy mortality excluding baseline malignancy, showed no significant differences between stage 3a and 3b, but significantly lower mortality for stages 4 and 5 compared to stage 3a.



- c) Results from all-cause mortality models using multiple imputation, complete case data, and mean value imputation with missing data indicators were compared (data not shown).
